# Supplementary material for: The adjustment of bandgap and coplanarity of diketopyrrolopyrrole-based copolymers through fine-tuning of the conjugated backbones and applications in thin film field effect transistors
Source: Royal Society of Chemistry journal article supplement (doi:10.1039/c6tc03299k), 2016-01-01
Supplement: c6tc03299k1.pdf [file c6tc03299k1.pdf]

## Supporting Information

### **The Adjustment of Band Gap and Coplanarity of Diketopyrrolopyrrole-based Copolymers Through Fine-tuning the Conjugated Backbones, and Applications in Thin Film Field Effect Transistors**

Jibin Sun, Zitong Liu,\* , Hwei Luo, Sifen Yang, Jingjing Yao, Guanxin Zhang,  
Deqing Zhang\*

Beijing National Laboratory for Molecular Sciences, Organic Solids Laboratory,  
Institute of Chemistry, Chinese Academy of Sciences, Beijing 100190, China

E-Mail: zitong\_@iccas.ac.cn, dqzhang@iccas.ac.cn.

### **Contents**

|                                                                                               |            |
|-----------------------------------------------------------------------------------------------|------------|
| <b>1. Characterization techniques</b>                                                         | <b>S2</b>  |
| <b>2. Thermogravimetric Analysis of P1, P2 and P3</b>                                         | <b>S3</b>  |
| <b>3. Full width at half maxima absorption of P1, P2 and P3</b>                               | <b>S4</b>  |
| <b>4. Ultraviolet photoelectron spectroscopy of P1, P2 and P3</b>                             | <b>S5</b>  |
| <b>5. Fabrication of FET devices</b>                                                          | <b>S6</b>  |
| <b>6. DFT calculations</b>                                                                    | <b>S7</b>  |
| <b>7. <sup>1</sup>H and <sup>13</sup>C NMR spectra, FTIR, and GPC traces of P1, P2 and P3</b> | <b>S15</b> |

## **1. Characterization techniques.**

All Chemicals were purchased from Alfa-Aesar, J&K and Sigma-Aldrich, and used without further purification. All solvents were purified and dried following standard procedures unless otherwise stated. IR spectra were recorded on a JASCO FT/IR-480 plus Fourier transform infrared spectrometer.  $^1\text{H}$  NMR and  $^{13}\text{C}$  NMR spectra were measured on a Bruker AVANCE III 400 and 500 MHz spectrometers. Elemental analysis was performed on a Carlo Erba model 1160 elemental analyzer. Gel permeation chromatography (GPC) analysis was performed on an PL-GPC 220 high temperature chromatograph at 150 °C equipped with a IR5 detector; polystyrene was used as the calibration standard and 1,2,4-trichlorobenzene as eluent; the flow rate was 1.0 mL/min. UV-vis absorption spectra were measured with JASCO V-570 UV-vis spectrophotometer. Ultraviolet photoelectron spectroscopy (UPS) was measured by AXIS ULTRA DLD with the illuminant of He I. Thermal gravimetric analysis (TGA) measurements were carried out on a SHIMADZU DTG-60 instruments under a dry nitrogen flow, heating from room temperature to 550 °C, with a heating rate of 10 °C/min. Atomic force microscopy (AFM) images of the thin films were obtained on a NanoscopeIII AFM (Digital instruments) operating in tapping mode. AFM samples and microscopic images were identical to those used in organic field-effect transistors. The GIXRD data were obtained at 1W1A, Beijing Synchrotron Radiation Facility.

## 2. Thermogravimetric Analysis of polymers P1, P2 and P3

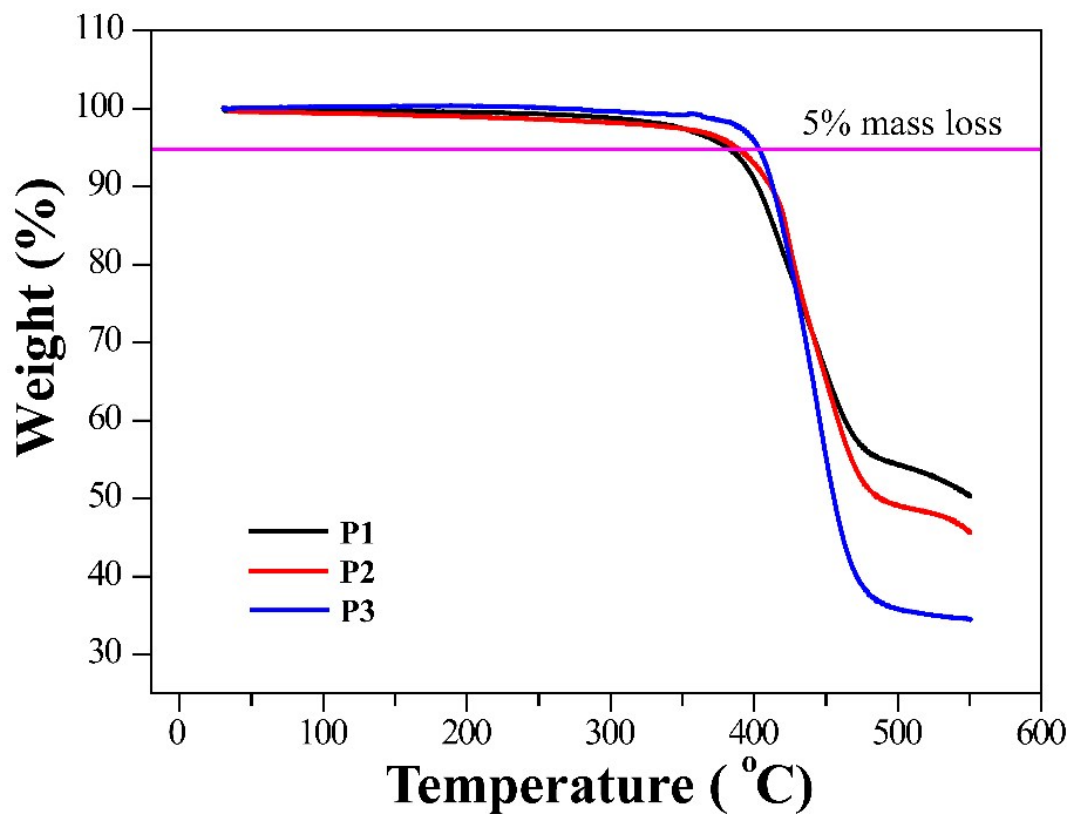

**Fig. S1** TGA curves of **P1**, **P2**, and **P3**: heating rate: 10 °C min<sup>-1</sup>. From 25 °C to 550 °C under nitrogen atmosphere. Decomposition temperatures (at 5% mass loss) are 381 °C, 387 °C, and 403 °C for **P1**, **P2** and **P3**, respectively.

### 3. Full width at half maxima absorption of polymers P1, P2 and P3

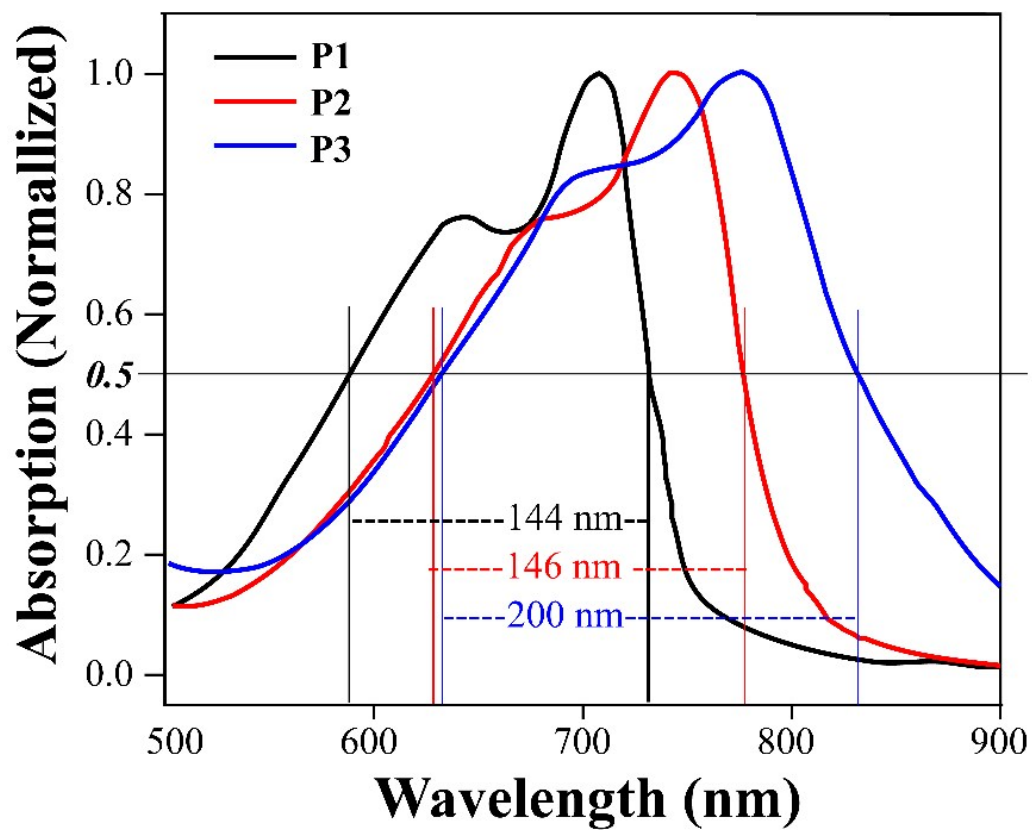

**Fig. S2** Full width at half maxima absorption for polymers **P1**, **P2** and **P3** based their thin films absorption spectra.

#### 4. Ultraviolet photoelectron spectroscopy polymers P1, P2 and P3

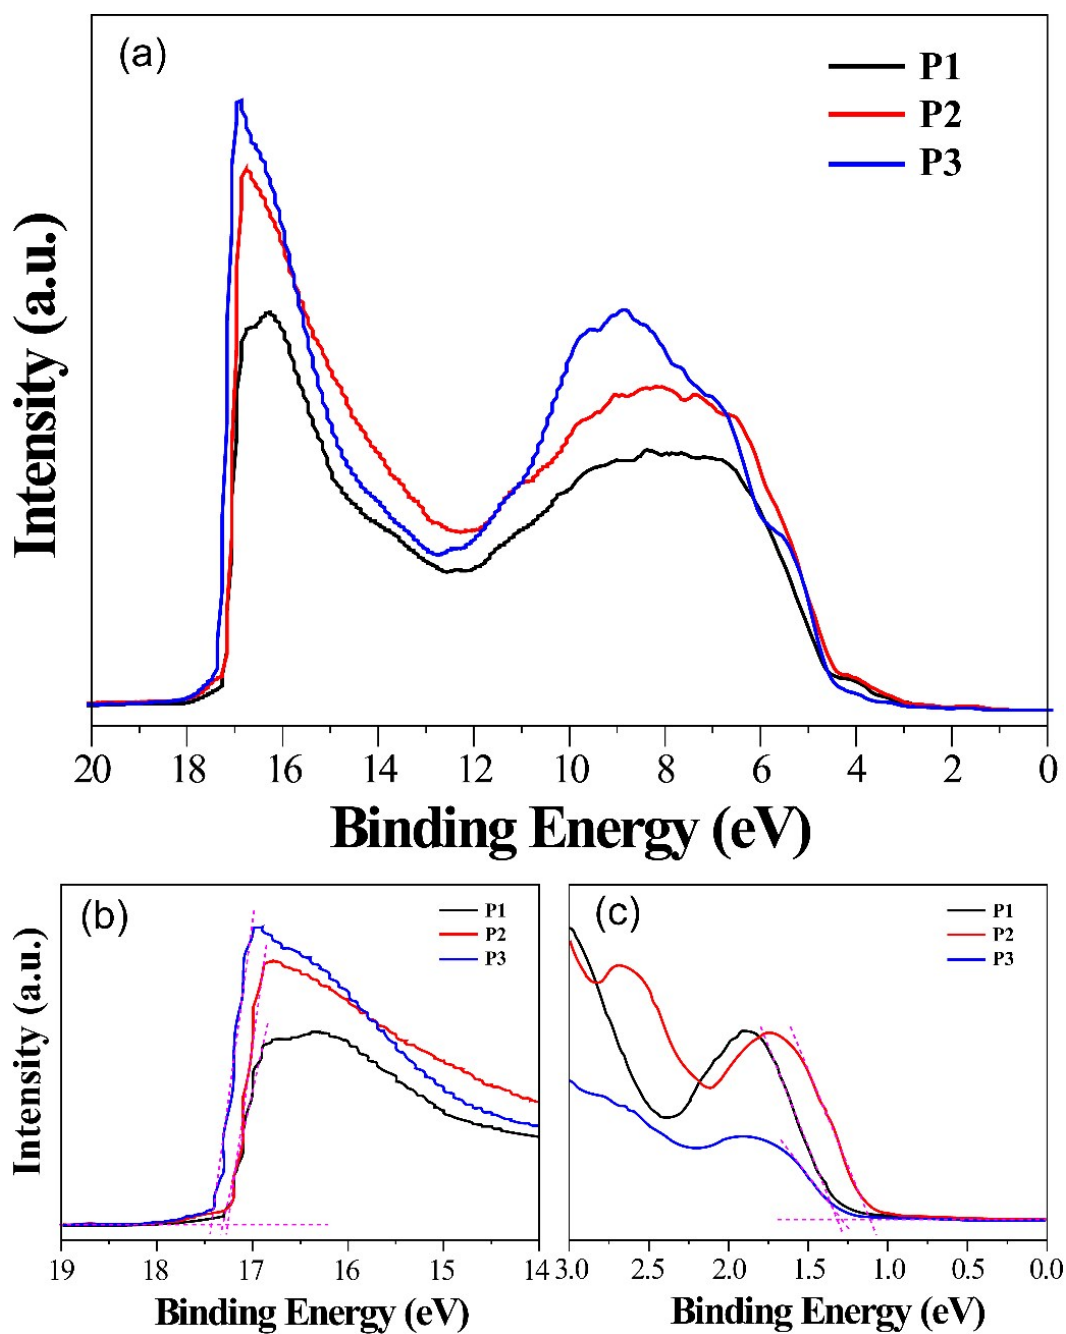

**Fig. S3** (a) UPS spectra of thin films of polymers **P1**, **P2** and **P3**; (b) high-energy region, and (c) low-energy region.

## 5. Fabrication of FET devices.

BG/BCFETs were fabricated. A heavily doped n-type Si wafer and a layer of dry oxidized SiO<sub>2</sub> (300 nm, with roughness lower than 0.1 nm and capacitance of 11 nF cm<sup>-2</sup>) were used as a gate electrode and gate dielectric layer, respectively. The drain-source (D-S) gold contacts were fabricated by photolithography. The substrates were first cleaned by sonication in acetone and water for 5.0 min and immersed in piranha solution (2:1 mixture of sulfuric acid and 30% hydrogen peroxide) for 20 min. This was followed by rinsing with deionized water, and isopropyl alcohol for several times, and it was blow-dried with nitrogen. Then, the surface was modified with *n*-octadecyltrichlorosilane (OTS). After that, the substrates were cleaned in *n*-hexane, CHCl<sub>3</sub> and isopropyl alcohol. The films of polymers (**P1**, **P2** and **P3**) were fabricated by spin-coating its *o*-dichlorobenzene solution (5 mg/mL) at 2000 rpm. The annealing process was carried out in vacuum for 30 min at each temperature. Field-effect characteristics of the devices were determined in air using a Keithley 4200 SCS semiconductor parameter analyzer.

The mobility of the OFETs in the saturation region was extracted from the following equation:

$$I_{DS} = \frac{W}{2L} \mu C_i (V_{GS} - V_{th})^2$$

Where  $I_{DS}$  is the drain electrode collected current;  $L$  and  $W$  are the channel length and width, respectively;  $\mu$  is the mobility of the device;  $C_i$  is the capacitance per unit area of the gate dielectric layer;  $V_{GS}$  is the gate voltage, and  $V_{th}$  is the threshold voltage. The  $V_{th}$  of the device was determined by extrapolating the  $(I_{DS, sat})^{1/2}$  vs.  $V_{GS}$  plot to  $I_{DS} = 0$ .

## 6. DFT calculations

Geometries optimization and frequency analysis were performed at the level of B3LYP/6-31G (d,p) by using Gaussian09 (revision A.02)<sup>S1</sup>. **Table S1**, **S2**, and **S3** list the coordinates and energies at the optimized geometries for two repeated units of **P1**, **P2** and **P3**, and there were no any imaginary frequencies. Then the molecular orbitals were analyzed, the energy gaps between HOMO and LUMO were obtained.

**Table S1.** Coordinates and energies of two repeated units of **P1**

| Labels | Atoms | X        | Y        | Z        |
|--------|-------|----------|----------|----------|
| 1      | C     | 12.55289 | 0.202345 | 0.242351 |
| 2      | C     | 13.93216 | 0.498973 | 0.411378 |
| 3      | C     | 14.11446 | 1.924712 | 0.246954 |
| 4      | N     | 12.79399 | 2.40952  | -0.0457  |
| 5      | C     | 11.85664 | 1.373072 | -0.04898 |
| 6      | C     | 12.37455 | -1.22598 | 0.383395 |
| 7      | N     | 13.70466 | -1.71845 | 0.612405 |
| 8      | C     | 14.63973 | -0.68052 | 0.627623 |
| 9      | O     | 15.08895 | 2.662587 | 0.334826 |
| 10     | O     | 11.38992 | -1.95633 | 0.361604 |
| 11     | C     | 10.45403 | 1.547527 | -0.3206  |
| 12     | C     | 16.05655 | -0.8657  | 0.823045 |
| 13     | C     | 9.767788 | 2.651128 | -0.81655 |
| 14     | C     | 8.383137 | 2.442687 | -0.96259 |
| 15     | C     | 7.971298 | 1.17812  | -0.58072 |
| 16     | S     | 9.326496 | 0.22359  | -0.03673 |
| 17     | C     | 16.81213 | -2.03179 | 0.834565 |
| 18     | C     | 18.19325 | -1.81245 | 1.050847 |
| 19     | C     | 18.49541 | -0.48355 | 1.206693 |
| 20     | S     | 17.10717 | 0.529184 | 1.076313 |
| 21     | C     | 12.58133 | 3.838584 | -0.17691 |
| 22     | C     | 13.8937  | -3.12795 | 0.899569 |
| 23     | C     | 3.982648 | -0.27127 | -0.6351  |
| 24     | C     | 5.039391 | -1.19891 | -0.66611 |
| 25     | C     | 6.350826 | -0.7494  | -0.64966 |
| 26     | C     | 6.618742 | 0.629156 | -0.60017 |
| 27     | C     | 5.492042 | 1.475745 | -0.56848 |
| 28     | N     | 4.234153 | 1.054459 | -0.59127 |
| 29     | C     | 2.556647 | -0.67434 | -0.65591 |

|    |   |          |          |          |
|----|---|----------|----------|----------|
| 30 | C | 1.55772  | 0.299331 | -0.83497 |
| 31 | C | 0.214771 | -0.04625 | -0.86719 |
| 32 | C | -0.1972  | -1.384   | -0.71108 |
| 33 | C | 0.802343 | -2.35682 | -0.51731 |
| 34 | C | 2.146062 | -2.00977 | -0.49448 |
| 35 | C | -7.49052 | -0.28673 | -0.29732 |
| 36 | C | -6.07869 | -0.17292 | -0.39854 |
| 37 | C | -5.73519 | 1.232393 | -0.42226 |
| 38 | N | -7.00655 | 1.898483 | -0.35678 |
| 39 | C | -8.06098 | 0.984575 | -0.28183 |
| 40 | C | -7.83596 | -1.69171 | -0.30319 |
| 41 | N | -6.57093 | -2.35702 | -0.43838 |
| 42 | C | -5.5143  | -1.44345 | -0.49573 |
| 43 | O | -4.66924 | 1.836472 | -0.45959 |
| 44 | O | -8.89783 | -2.29605 | -0.19845 |
| 45 | C | -9.45086 | 1.350656 | -0.21474 |
| 46 | C | -4.13104 | -1.81052 | -0.63843 |
| 47 | C | -10.0651 | 2.583617 | -0.4085  |
| 48 | C | -11.4663 | 2.549758 | -0.27231 |
| 49 | C | -11.9618 | 1.294401 | 0.032654 |
| 50 | S | -10.6687 | 0.12902  | 0.145078 |
| 51 | C | -3.5573  | -3.03653 | -0.96118 |
| 52 | C | -2.15145 | -3.00837 | -1.01815 |
| 53 | C | -1.60895 | -1.76548 | -0.74013 |
| 54 | S | -2.86771 | -0.60466 | -0.40849 |
| 55 | C | -7.04039 | 3.345472 | -0.25942 |
| 56 | C | -6.52477 | -3.80548 | -0.37234 |
| 57 | C | -16.0426 | 0.307023 | 0.645022 |
| 58 | C | -15.1442 | -0.71819 | 0.300675 |
| 59 | C | -13.8066 | -0.41905 | 0.090741 |
| 60 | C | -13.3528 | 0.902204 | 0.241485 |
| 61 | C | -14.3234 | 1.847951 | 0.627796 |
| 62 | N | -15.6092 | 1.573521 | 0.81395  |
| 63 | C | -17.4913 | 0.063043 | 0.859208 |
| 64 | C | -18.2645 | 1.020761 | 1.537868 |
| 65 | C | -19.6225 | 0.810996 | 1.759995 |
| 66 | C | -20.2398 | -0.35598 | 1.304119 |
| 67 | C | -19.4859 | -1.3098  | 0.618785 |
| 68 | C | -18.1259 | -1.10264 | 0.397599 |
| 69 | H | 10.24665 | 3.576451 | -1.09895 |
| 70 | H | 7.711056 | 3.189266 | -1.36864 |
| 71 | H | 16.39879 | -3.01569 | 0.672938 |
| 72 | H | 18.93007 | -2.60621 | 1.085787 |
| 73 | H | 19.46571 | -0.03888 | 1.381947 |



|     |   |          |          |          |
|-----|---|----------|----------|----------|
| 74  | H | 13.52522 | 4.312058 | 0.097805 |
| 75  | H | 12.33937 | 4.122671 | -1.20658 |
| 76  | H | 11.78965 | 4.184312 | 0.49321  |
| 77  | H | 14.41458 | -3.64398 | 0.086031 |
| 78  | H | 14.44336 | -3.27108 | 1.833643 |
| 79  | H | 12.89407 | -3.55485 | 0.994331 |
| 80  | H | 4.844905 | -2.26306 | -0.72702 |
| 81  | H | 7.167276 | -1.46424 | -0.69732 |
| 82  | H | 5.629087 | 2.553419 | -0.50255 |
| 83  | H | 1.861379 | 1.332229 | -0.95559 |
| 84  | H | -0.52679 | 0.729327 | -1.03485 |
| 85  | H | 0.520181 | -3.39177 | -0.35364 |
| 86  | H | 2.8761   | -2.7929  | -0.31993 |
| 87  | H | -9.5307  | 3.48345  | -0.67332 |
| 88  | H | -12.0985 | 3.415997 | -0.42707 |
| 89  | H | -4.12877 | -3.92516 | -1.18369 |
| 90  | H | -1.55233 | -3.86924 | -1.29004 |
| 91  | H | -6.00368 | 3.665999 | -0.14491 |
| 92  | H | -7.4465  | 3.806472 | -1.16611 |
| 93  | H | -7.62205 | 3.670748 | 0.6074   |
| 94  | H | -6.26756 | -4.25078 | -1.3394  |
| 95  | H | -5.81326 | -4.14389 | 0.385575 |
| 96  | H | -7.53071 | -4.12975 | -0.10117 |
| 97  | H | -15.4834 | -1.74303 | 0.205922 |
| 98  | H | -13.1156 | -1.2061  | -0.19756 |
| 99  | H | -14.0282 | 2.88001  | 0.807915 |
| 100 | H | -17.7773 | 1.924931 | 1.8837   |
| 101 | H | -20.2017 | 1.56016  | 2.292151 |
| 102 | H | -21.2996 | -0.5186  | 1.477021 |
| 103 | H | -19.9583 | -2.21497 | 0.248457 |
| 104 | H | -17.5658 | -1.84651 | -0.15977 |

**Total energy:** = -4301.670181 Hartrees

**Table S2.** Coordinates and energies of two repeated units of **P2**

| Labels | Atoms | X        | Y        | Z        |
|--------|-------|----------|----------|----------|
| 1      | C     | 12.35977 | 0.39931  | 0.084381 |
| 2      | C     | 13.77505 | 0.492029 | 0.167114 |
| 3      | C     | 14.3199  | -0.84805 | 0.153927 |
| 4      | N     | 13.16195 | -1.69006 | 0.035185 |
| 5      | C     | 11.98423 | -0.93913 | -0.00846 |
| 6      | C     | 11.81647 | 1.73948  | 0.076719 |

|    |   |          |          |          |
|----|---|----------|----------|----------|
| 7  | N | 12.97806 | 2.582861 | 0.134656 |
| 8  | C | 14.15486 | 1.831799 | 0.186835 |
| 9  | O | 15.45856 | -1.29279 | 0.241321 |
| 10 | O | 10.6735  | 2.182997 | 0.055147 |
| 11 | C | 10.6662  | -1.50131 | -0.13968 |
| 12 | C | 15.48011 | 2.398301 | 0.236152 |
| 13 | C | 10.27088 | -2.80184 | -0.43643 |
| 14 | C | 8.875236 | -2.9735  | -0.49724 |
| 15 | C | 8.16338  | -1.8132  | -0.24587 |
| 16 | S | 9.245079 | -0.47969 | 0.065671 |
| 17 | C | 15.89789 | 3.713124 | 0.068451 |
| 18 | C | 17.29814 | 3.883644 | 0.179763 |
| 19 | C | 17.95173 | 2.704728 | 0.433575 |
| 20 | S | 16.87768 | 1.360411 | 0.526799 |
| 21 | C | 13.32986 | -3.13002 | 0.087984 |
| 22 | C | 12.79994 | 4.018957 | 0.238651 |
| 23 | C | 1.651554 | -2.51652 | 0.00109  |
| 24 | C | 0.279625 | -2.18807 | -0.0277  |
| 25 | C | 0.033308 | -0.83995 | -0.22465 |
| 26 | S | 1.547825 | 0.036412 | -0.37369 |
| 27 | C | 2.485367 | -1.43011 | -0.1728  |
| 28 | C | 3.944803 | -1.44167 | -0.19431 |
| 29 | C | 4.717996 | -0.2807  | -0.37842 |
| 30 | C | 6.099696 | -0.37893 | -0.40004 |
| 31 | C | 6.716158 | -1.63139 | -0.23043 |
| 32 | C | 5.849046 | -2.72795 | -0.0349  |
| 33 | N | 4.525393 | -2.65047 | -0.02243 |
| 34 | C | -7.30358 | -0.30118 | -0.07718 |
| 35 | C | -5.94554 | -0.71197 | -0.065   |
| 36 | C | -5.90662 | -2.14704 | 0.107669 |
| 37 | N | -7.29016 | -2.52525 | 0.173453 |
| 38 | C | -8.13143 | -1.41521 | 0.059715 |
| 39 | C | -7.34351 | 1.132253 | -0.26453 |
| 40 | N | -5.96139 | 1.50563  | -0.37214 |
| 41 | C | -5.11809 | 0.396139 | -0.25251 |
| 42 | O | -4.99061 | -2.95666 | 0.20598  |
| 43 | O | -8.25889 | 1.946451 | -0.31847 |
| 44 | C | -9.56818 | -1.4771  | 0.075532 |
| 45 | C | -3.68444 | 0.448254 | -0.32514 |
| 46 | C | -10.4209 | -2.57613 | 0.03234  |
| 47 | C | -11.7872 | -2.23921 | 0.047784 |
| 48 | C | -12.0207 | -0.87617 | 0.10677  |
| 49 | S | -10.5168 | 0.00784  | 0.139086 |
| 50 | C | -2.83455 | 1.51873  | -0.5944  |

|    |   |          |          |          |
|----|---|----------|----------|----------|
| 51 | C | -1.47091 | 1.182713 | -0.58614 |
| 52 | C | -1.23195 | -0.15491 | -0.30993 |
| 53 | S | -2.73188 | -1.01537 | -0.05763 |
| 54 | C | -7.62952 | -3.91275 | 0.425913 |
| 55 | C | -5.62315 | 2.908252 | -0.51824 |
| 56 | C | -18.3166 | 0.873191 | 0.67343  |
| 57 | C | -19.4889 | 1.674717 | 0.613307 |
| 58 | C | -19.242  | 2.94416  | 0.16311  |
| 59 | S | -17.564  | 3.181785 | -0.19633 |
| 60 | C | -17.1785 | 1.535264 | 0.268668 |
| 61 | C | -15.8206 | 0.993607 | 0.212081 |
| 62 | C | -14.7114 | 1.751701 | -0.20394 |
| 63 | C | -13.4588 | 1.16082  | -0.24698 |
| 64 | C | -13.3053 | -0.18416 | 0.132968 |
| 65 | C | -14.4774 | -0.84643 | 0.553994 |
| 66 | N | -15.6844 | -0.2966  | 0.589045 |
| 67 | H | 10.96188 | -3.60671 | -0.63662 |
| 68 | H | 8.405647 | -3.91606 | -0.75203 |
| 69 | H | 15.22868 | 4.532325 | -0.14621 |
| 70 | H | 17.79798 | 4.839127 | 0.073005 |
| 71 | H | 19.01422 | 2.548603 | 0.562706 |
| 72 | H | 14.37995 | -3.30391 | 0.328084 |
| 73 | H | 12.69907 | -3.57414 | 0.862769 |
| 74 | H | 13.11275 | -3.60225 | -0.87603 |
| 75 | H | 13.33157 | 4.422186 | 1.104678 |
| 76 | H | 13.12978 | 4.537585 | -0.66768 |
| 77 | H | 11.7281  | 4.183212 | 0.35969  |
| 78 | H | 2.04646  | -3.5141  | 0.142011 |
| 79 | H | -0.51404 | -2.91795 | 0.086754 |
| 80 | H | 4.2427   | 0.685494 | -0.51394 |
| 81 | H | 6.701231 | 0.51024  | -0.56462 |
| 82 | H | 6.264988 | -3.71886 | 0.13636  |
| 83 | H | -10.0788 | -3.59725 | -0.03933 |
| 84 | H | -12.579  | -2.97593 | -0.01666 |
| 85 | H | -3.17853 | 2.519308 | -0.80484 |
| 86 | H | -0.68116 | 1.898246 | -0.7849  |
| 87 | H | -6.68576 | -4.42418 | 0.621589 |
| 88 | H | -8.28358 | -4.00941 | 1.296901 |
| 89 | H | -8.10423 | -4.38105 | -0.44277 |
| 90 | H | -4.97191 | 3.249574 | 0.291757 |
| 91 | H | -5.14777 | 3.112859 | -1.48298 |
| 92 | H | -6.5683  | 3.451489 | -0.47226 |
| 93 | H | -18.2845 | -0.1581  | 1.000139 |
| 94 | H | -20.4757 | 1.324267 | 0.892678 |

|    |   |          |          |          |
|----|---|----------|----------|----------|
| 95 | H | -19.9419 | 3.755618 | 0.020056 |
| 96 | H | -14.8302 | 2.78878  | -0.50052 |
| 97 | H | -12.6029 | 1.734771 | -0.58992 |
| 98 | H | -14.4193 | -1.87817 | 0.895414 |

**Total energy:** = -4943.178513 Hartrees

**Table S3.** Coordinates and energies of two repeated units of **P3**

| Labels | Atoms | X        | Y        | Z        |
|--------|-------|----------|----------|----------|
| 1      | C     | 12.37483 | -0.14843 | 0.018176 |
| 2      | C     | 13.78509 | 0.010696 | -0.01545 |
| 3      | C     | 14.07974 | 1.416912 | -0.18192 |
| 4      | N     | 12.78512 | 2.038724 | -0.22206 |
| 5      | C     | 11.75903 | 1.096613 | -0.10228 |
| 6      | C     | 12.08037 | -1.55244 | 0.196074 |
| 7      | N     | 13.37492 | -2.16952 | 0.277711 |
| 8      | C     | 14.39972 | -1.22889 | 0.151615 |
| 9      | O     | 15.12442 | 2.048327 | -0.29311 |
| 10     | O     | 11.03424 | -2.18927 | 0.260062 |
| 11     | C     | 10.3561  | 1.410654 | -0.1025  |
| 12     | C     | 15.80601 | -1.54338 | 0.201613 |
| 13     | C     | 9.708635 | 2.642896 | -0.1151  |
| 14     | C     | 8.305889 | 2.552221 | -0.10776 |
| 15     | C     | 7.836846 | 1.248379 | -0.09065 |
| 16     | S     | 9.162395 | 0.109011 | -0.07229 |
| 17     | C     | 16.44706 | -2.7356  | 0.517428 |
| 18     | C     | 17.85855 | -2.65468 | 0.463071 |
| 19     | C     | 18.29911 | -1.4059  | 0.105559 |
| 20     | S     | 17.0053  | -0.29901 | -0.15926 |
| 21     | C     | 12.69958 | 3.469788 | -0.44073 |
| 22     | C     | 13.45902 | -3.61341 | 0.39052  |
| 23     | C     | 5.988373 | -0.50676 | -0.07703 |
| 24     | N     | 4.639427 | -0.663   | -0.07306 |
| 25     | C     | 4.016567 | 0.494798 | -0.07535 |
| 26     | S     | 5.103573 | 1.890721 | -0.08347 |
| 27     | C     | 6.471968 | 0.788655 | -0.08303 |
| 28     | C     | 1.801604 | 1.770013 | -0.06217 |
| 29     | C     | 0.418318 | 1.497967 | -0.06418 |
| 30     | C     | 0.121492 | 0.14386  | -0.07718 |
| 31     | S     | 1.592835 | -0.81253 | -0.08595 |
| 32     | C     | 2.58458  | 0.629775 | -0.07328 |
| 33     | C     | -7.23483 | -0.06775 | 0.008097 |

|    |   |          |          |          |
|----|---|----------|----------|----------|
| 34 | C | -5.86143 | 0.284165 | 0.029134 |
| 35 | C | -5.76239 | 1.718585 | 0.181289 |
| 36 | N | -7.12819 | 2.154102 | 0.257109 |
| 37 | C | -8.01658 | 1.079166 | 0.153583 |
| 38 | C | -7.33423 | -1.50296 | -0.13697 |
| 39 | N | -5.96849 | -1.94193 | -0.18349 |
| 40 | C | -5.0798  | -0.86721 | -0.08263 |
| 41 | O | -4.81301 | 2.493296 | 0.233588 |
| 42 | O | -8.28451 | -2.27303 | -0.22376 |
| 43 | C | -9.44797 | 1.194105 | 0.20105  |
| 44 | C | -3.64844 | -0.98745 | -0.09004 |
| 45 | C | -10.2549 | 2.306307 | 0.425624 |
| 46 | C | -11.6323 | 2.028312 | 0.401728 |
| 47 | C | -11.923  | 0.695625 | 0.157753 |
| 48 | S | -10.4579 | -0.23598 | -0.0415  |
| 49 | C | -2.84081 | -2.12281 | -0.10762 |
| 50 | C | -1.46441 | -1.84558 | -0.10385 |
| 51 | C | -1.17291 | -0.48998 | -0.08428 |
| 52 | S | -2.63879 | 0.461314 | -0.06135 |
| 53 | C | -7.40762 | 3.572623 | 0.370253 |
| 54 | C | -5.69124 | -3.35272 | -0.37578 |
| 55 | C | -13.5307 | -1.26244 | -0.13565 |
| 56 | N | -14.8511 | -1.58617 | -0.17994 |
| 57 | C | -15.6147 | -0.53132 | -0.0152  |
| 58 | S | -14.7147 | 0.974489 | 0.210082 |
| 59 | C | -13.2165 | 0.067323 | 0.066536 |
| 60 | C | -17.9669 | 0.452465 | 0.151506 |
| 61 | C | -19.3166 | 0.014847 | 0.08906  |
| 62 | C | -19.4223 | -1.33532 | -0.1231  |
| 63 | S | -17.8762 | -2.1022  | -0.25122 |
| 64 | C | -17.0572 | -0.57214 | -0.01441 |
| 65 | H | 10.224   | 3.590717 | -0.11908 |
| 66 | H | 7.653684 | 3.418178 | -0.11383 |
| 67 | H | 15.929   | -3.64032 | 0.795902 |
| 68 | H | 18.51731 | -3.48662 | 0.682339 |
| 69 | H | 19.32067 | -1.06985 | -0.01021 |
| 70 | H | 13.72419 | 3.812507 | -0.59361 |
| 71 | H | 12.10453 | 3.703911 | -1.3283  |
| 72 | H | 12.28307 | 3.989469 | 0.428325 |
| 73 | H | 14.06563 | -4.04027 | -0.41291 |
| 74 | H | 13.86354 | -3.9227  | 1.359819 |
| 75 | H | 12.43569 | -3.98268 | 0.307746 |
| 76 | H | 6.620737 | -1.38771 | -0.07543 |
| 77 | H | 2.214565 | 2.772464 | -0.05204 |

|    |   |          |          |          |
|----|---|----------|----------|----------|
| 78 | H | -0.34321 | 2.269435 | -0.0562  |
| 79 | H | -9.87217 | 3.297236 | 0.613138 |
| 80 | H | -12.3943 | 2.782242 | 0.563075 |
| 81 | H | -3.22397 | -3.13115 | -0.11311 |
| 82 | H | -0.70279 | -2.61696 | -0.11376 |
| 83 | H | -6.43945 | 4.074096 | 0.329475 |
| 84 | H | -8.03052 | 3.925082 | -0.4571  |
| 85 | H | -7.88902 | 3.816663 | 1.322756 |
| 86 | H | -5.08542 | -3.52269 | -1.27056 |
| 87 | H | -5.19248 | -3.79058 | 0.494823 |
| 88 | H | -6.66155 | -3.8354  | -0.50185 |
| 89 | H | -12.7921 | -2.04717 | -0.25605 |
| 90 | H | -17.6755 | 1.484335 | 0.313323 |
| 91 | H | -20.1702 | 0.673409 | 0.197087 |
| 92 | H | -20.3234 | -1.92634 | -0.21171 |

---

**Total energy:** = -5584.702103 Hartrees

## References

(S1) Frisch, M. J.; Trucks, G. W.; Schlegel, H. B.; Scuseria, G. E.; Robb, M. A.; Cheeseman, J. R.; Scalmani, G.; Barone, V.; Mennucci, B.; Petersson, G. A.; Nakatsuji, H.; Caricato, M.; Li, X.; Hratchian, H. P.; Izmaylov, A. F.; Bloino, J.; Zheng, G.; Sonnenberg, J. L.; Hada, M.; Ehara, M.; Toyota, K.; Fukuda, R.; Hasegawa, J.; Ishida, M.; Nakajima, T.; Honda, Y.; Kitao, O.; Nakai, H.; Vreven, T.; Montgomery, J. A.; Peralta, Jr., J. E.; Ogliaro, F.; Bearpark, M.; Heyd, J. J.; Brothers, E.; Kudin, K. N.; Staroverov, V. N.; Kobayashi, R.; Normand, J.; Raghavachari, K.; Rendell, A.; Burant, J. C.; Iyengar, S. S.; Tomasi, J.; Cossi, M.; Rega, N.; Millam, J. M.; Klene, M.; Knox, J. E.; Cross, J. B.; Bakken, V.; Adamo, C.; Jaramillo, J.; Gomperts, R.; Stratmann, R. E.; Yazyev, O.; Austin, A. J.; Cammi, R.; Pomelli, C.; Ochterski, J. W.; Martin, R. L.; Morokuma, K.; Zakrzewski, V. G.; Voth, G. A.; Salvador, P.; Dannenberg, J. J.; Dapprich, S.; Daniels, A. D.; Farkas, O.; Foresman, J. B.; Ortiz, J. V.; Cioslowski, J. and Fox, D. J. Gaussian, Inc., Wallingford CT, 2009.

## 7. $^1\text{H}$ and $^{13}\text{C}$ NMR spectra, FTIR, and GPC traces of P1, P2 and P3

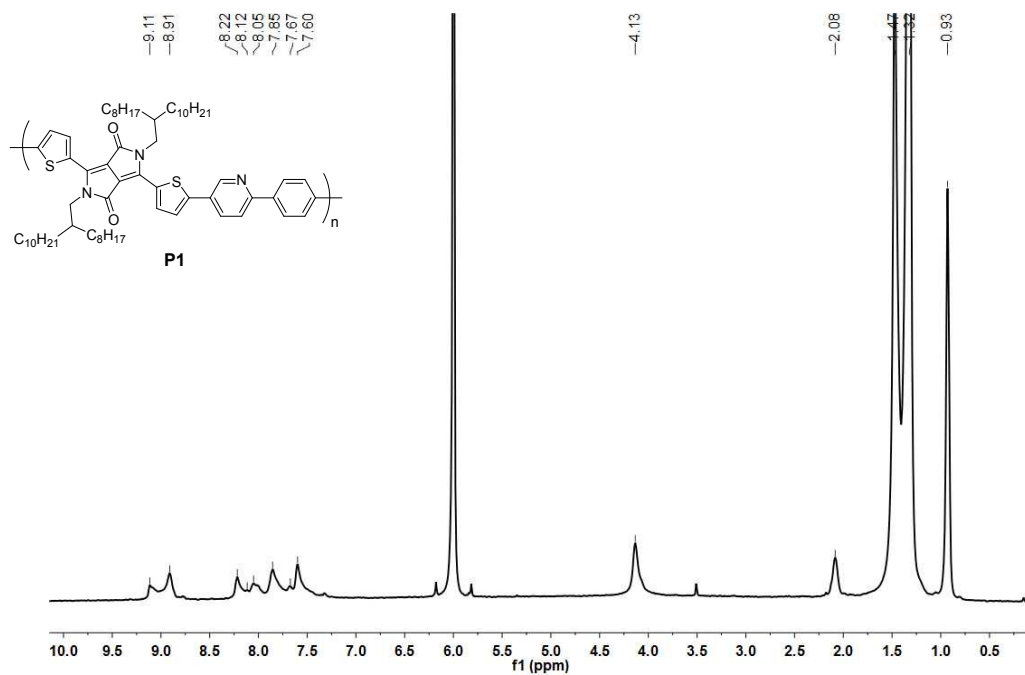

**Fig. S4** High temperature  $^1\text{H}$  NMR spectrum of **P1** (500 MHz, 1,1,2,2-tetrachloroethane- $d_2$ , 373 K).

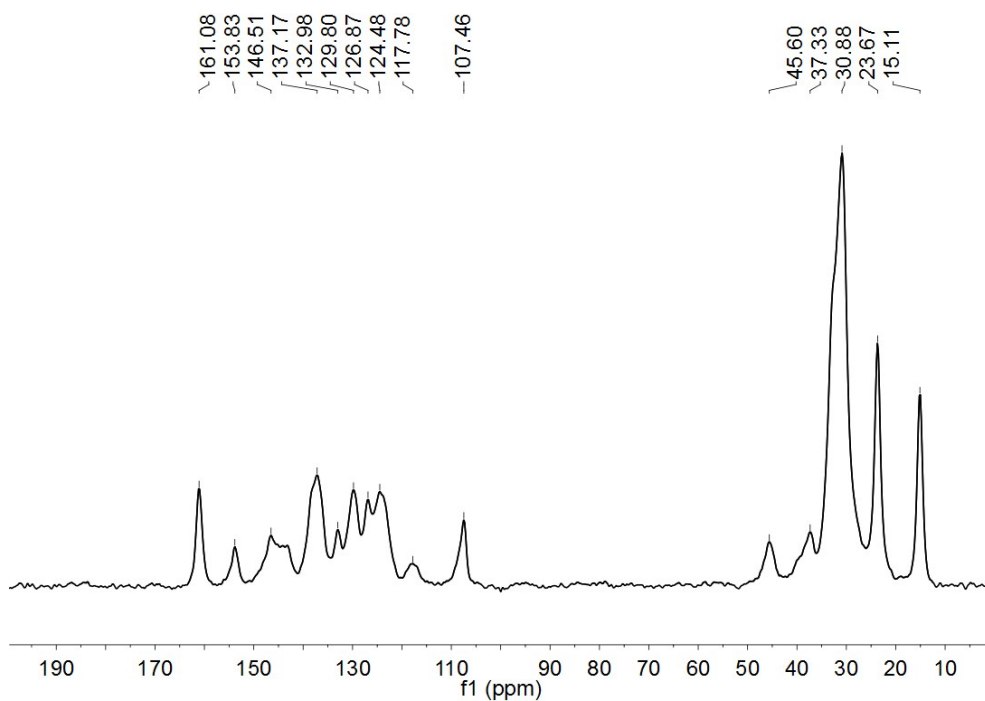

**Fig. S5**  $^{13}\text{C}$  NMR spectrum of **P1** (100 MHz, solid).

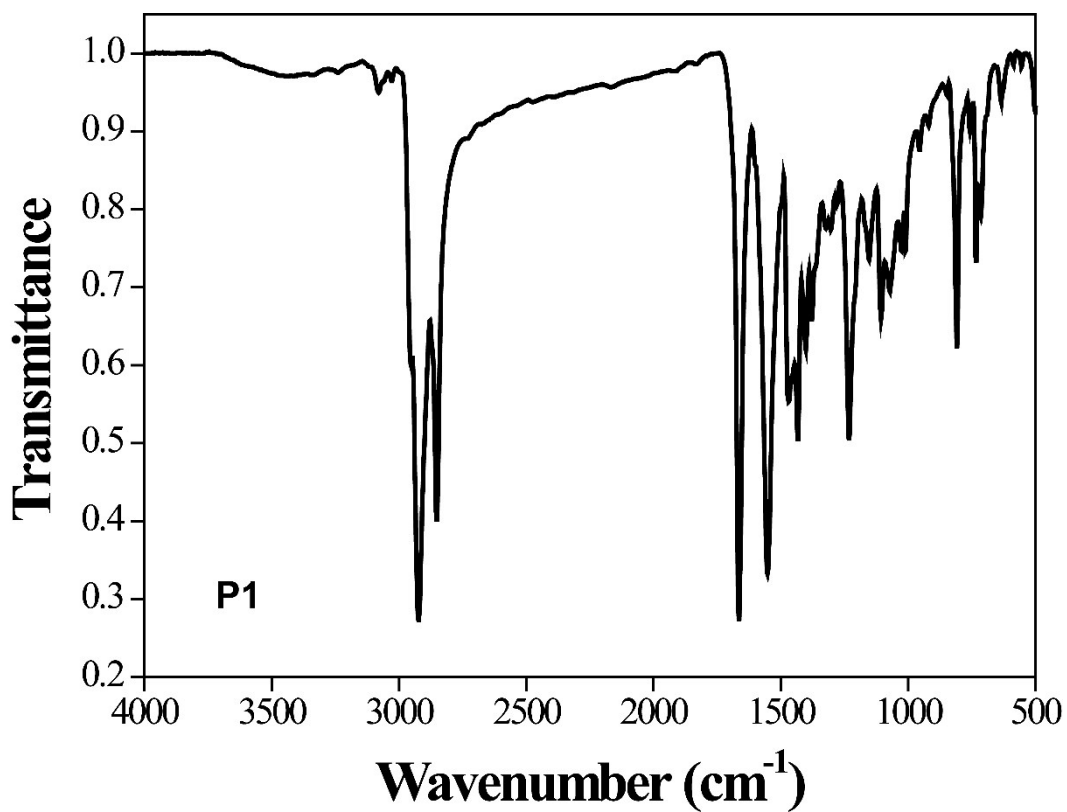

Fig. S6 FTIR spectrum of P1.

**MW Averages**

|           |             |            |           |
|-----------|-------------|------------|-----------|
| Mp: 18154 | Mn: 16234   | Mv: 24515  | Mw: 26291 |
| Mz: 42032 | Mz+1: 64051 | PD: 1.6195 |           |

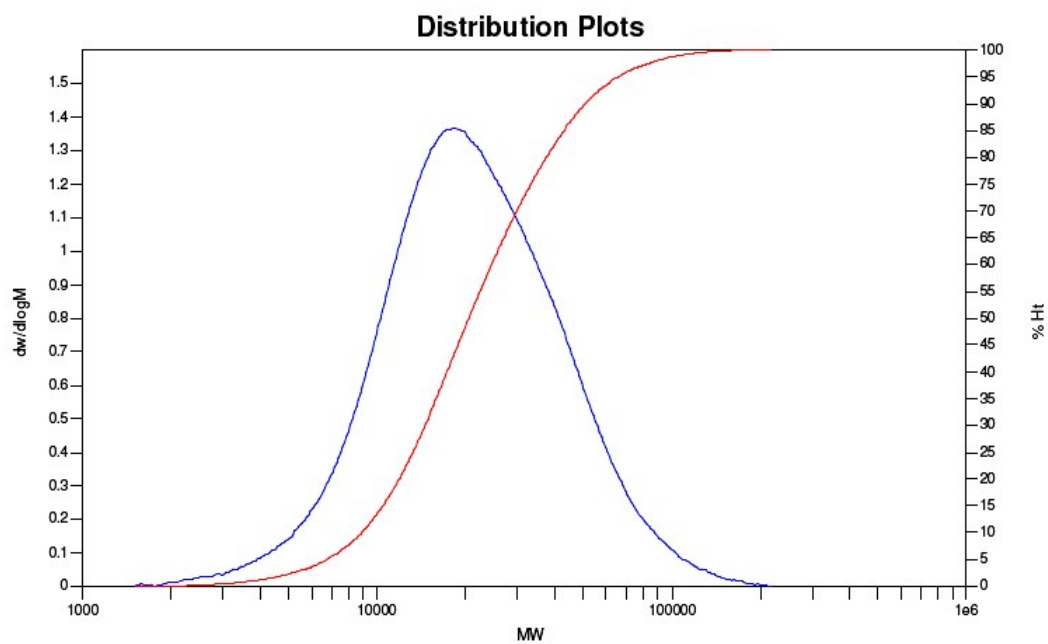

Fig. S7 GPC trace for P1.



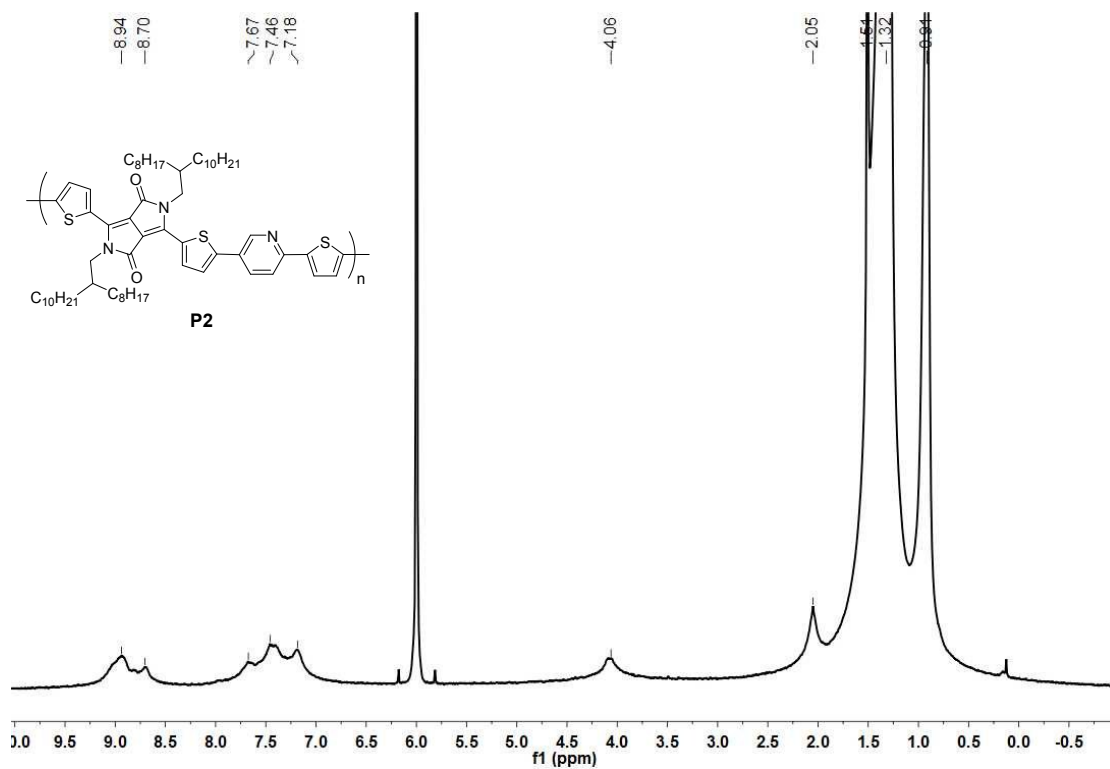

**Fig. S8** High temperature <sup>1</sup>H NMR spectrum of **P2** (500 MHz, 1,1,2,2-tetrachloroethane-*d*<sub>2</sub>, 373 K).

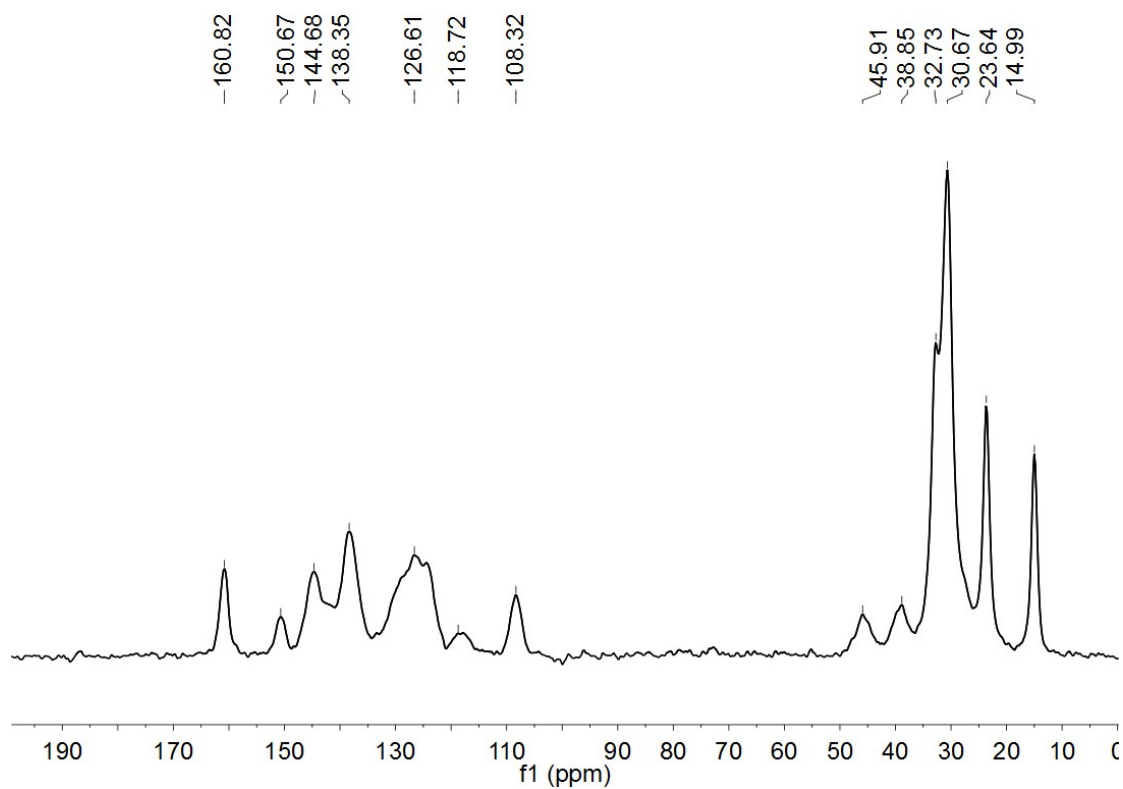

**Fig. S9** <sup>13</sup>C NMR spectrum of **P2** (100 MHz, solid).

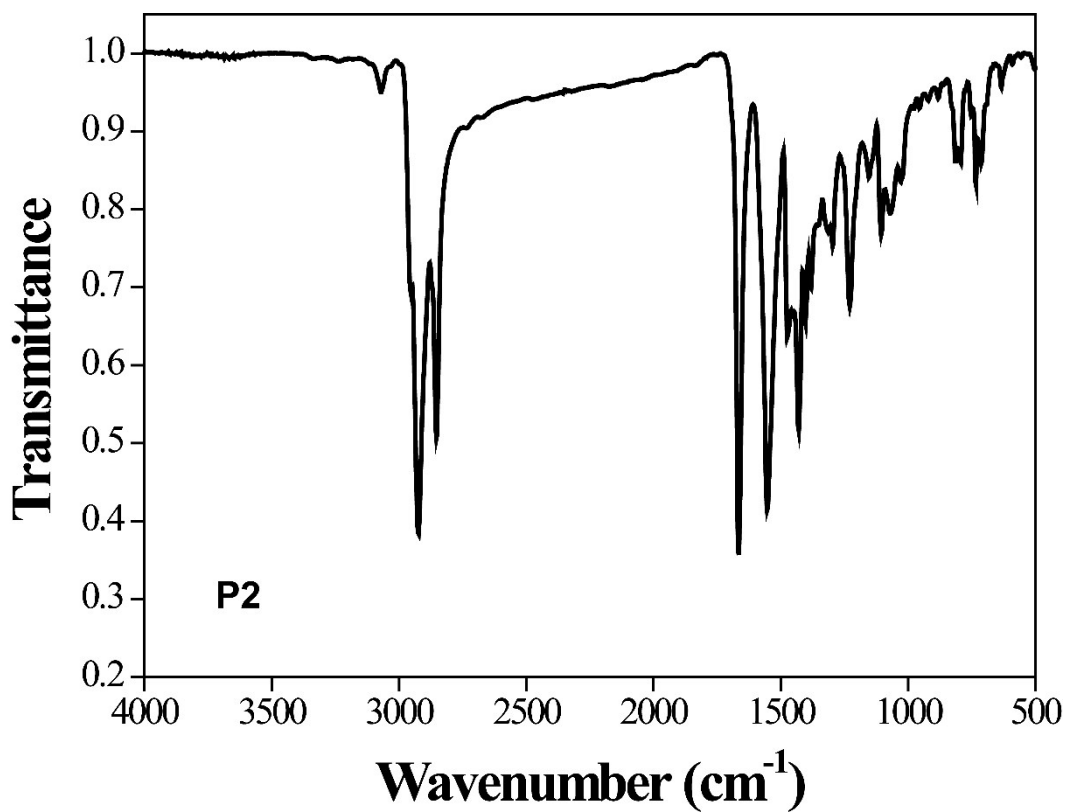

Fig. S10 FTIR spectrum of P2

**MW Averages**

|            |              |            |           |
|------------|--------------|------------|-----------|
| Mp: 54965  | Mn: 35553    | Mv: 66810  | Mw: 73604 |
| Mz: 133871 | Mz+1: 210753 | PD: 2.0703 |           |

**Distribution Plots**

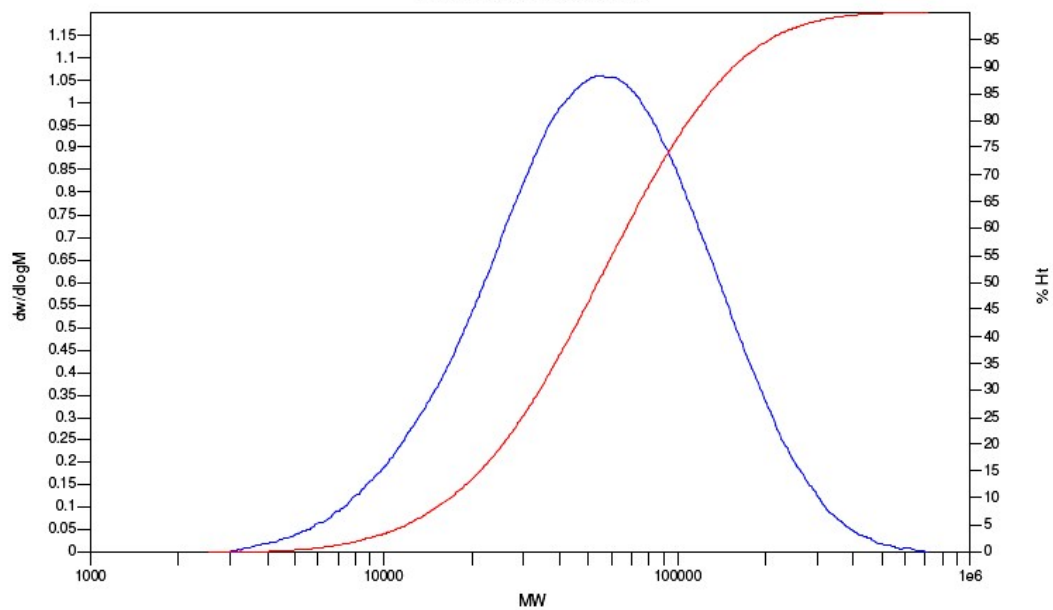

Fig. S11 GPC trace for P2

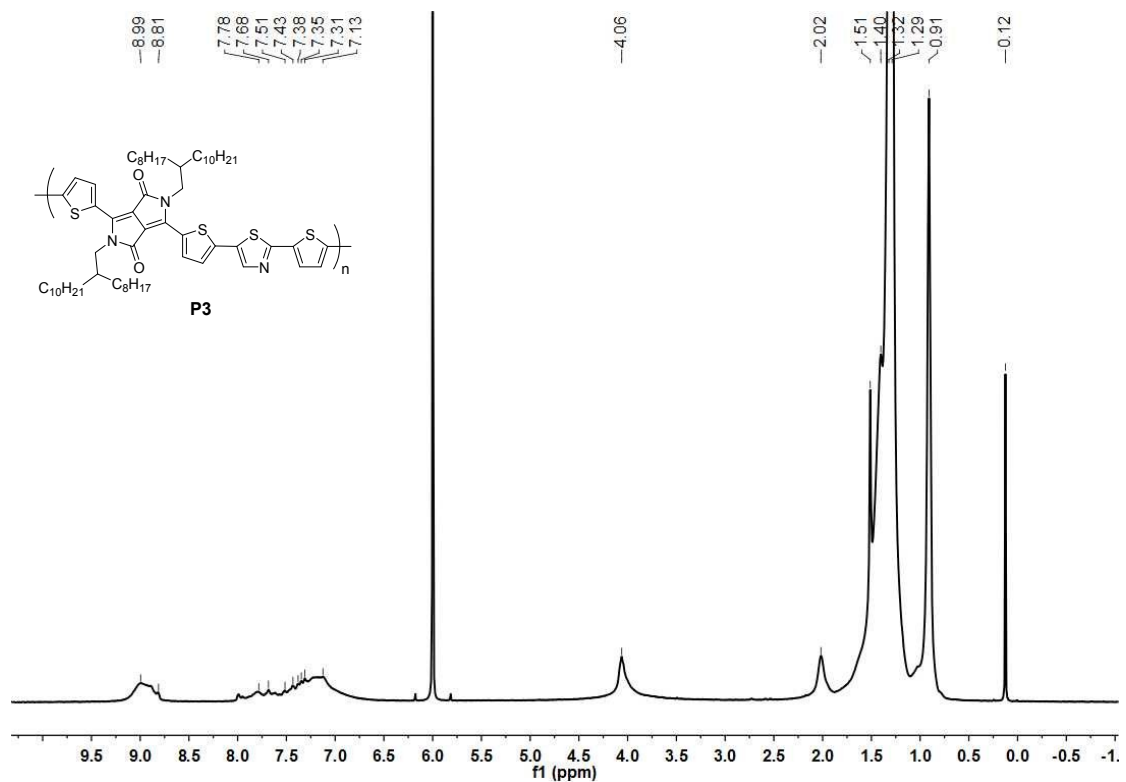

**Fig. S12** High temperature  $^1\text{H}$  NMR spectrum of **P3** (500 MHz, 1,1,2,2-tetrachloroethane- $d_2$ , 373 K).

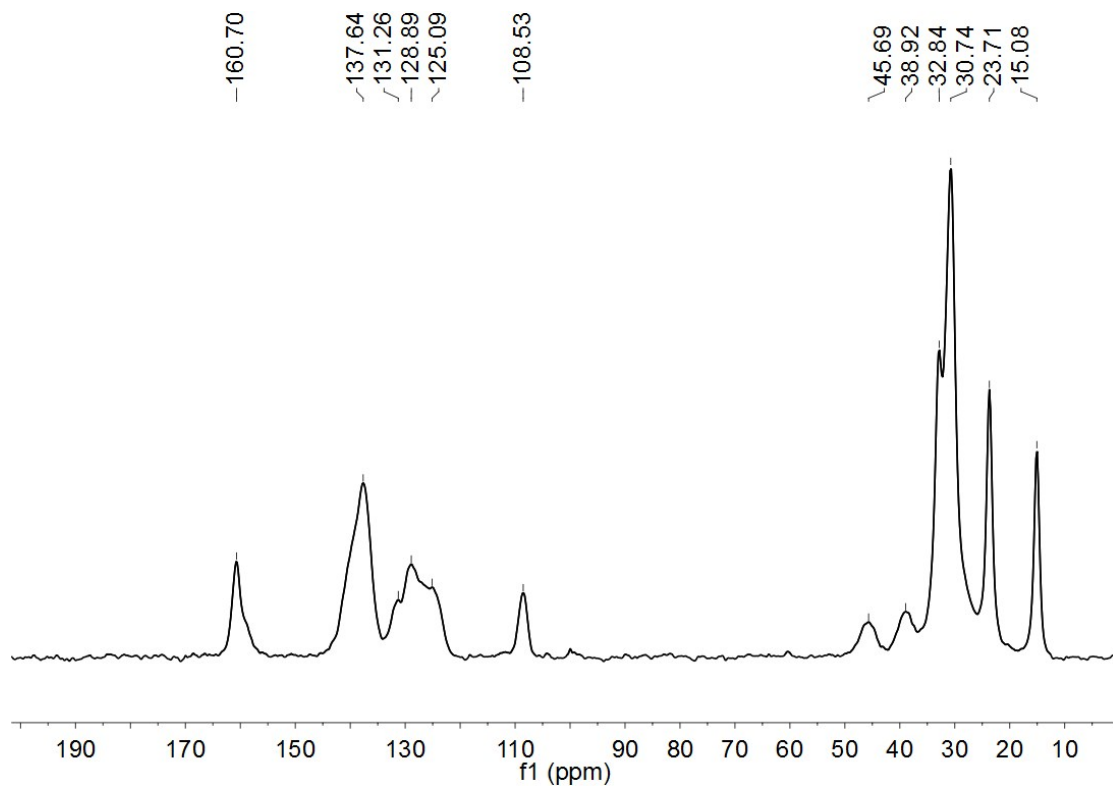

**Fig. S13**  $^{13}\text{C}$  NMR spectrum of **P3** (100 MHz, solid)

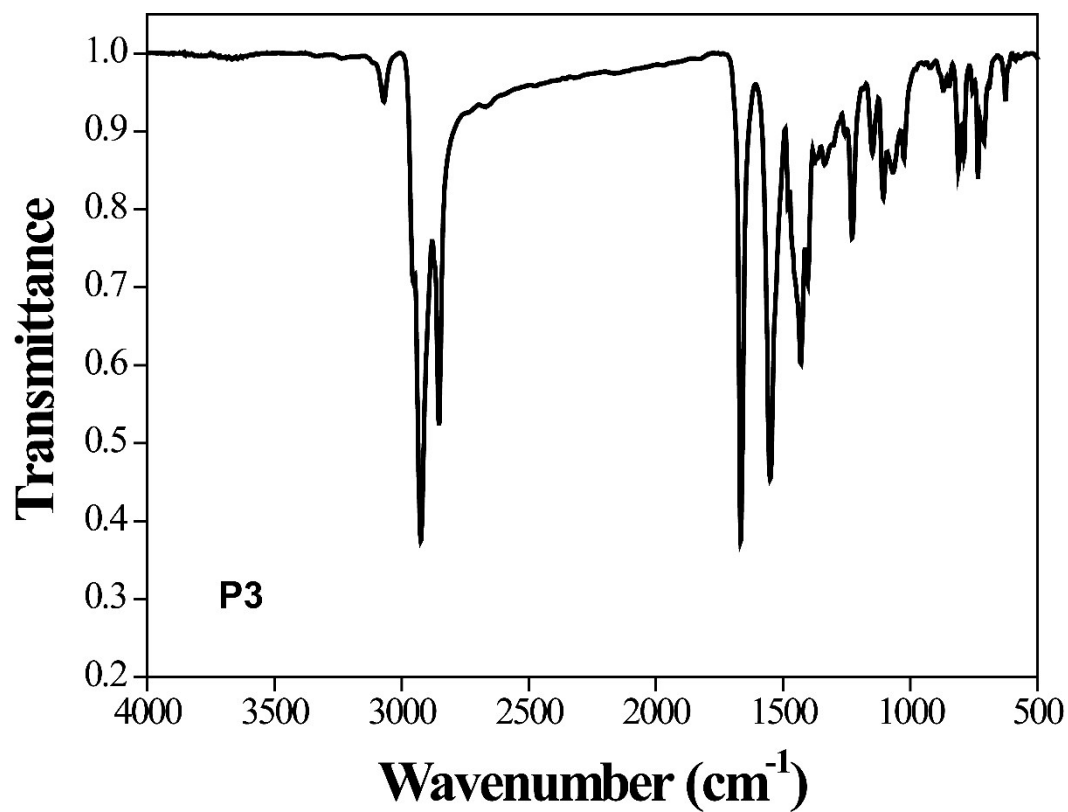

**Fig. S14** FTIR spectrum of **P3**

**MW Averages**

|           |              |            |           |
|-----------|--------------|------------|-----------|
| Mp: 19520 | Mn: 9942     | Mv: 23233  | Mw: 26669 |
| Mz: 67750 | Mz+1: 152751 | PD: 2.6825 |           |

**Distribution Plots**

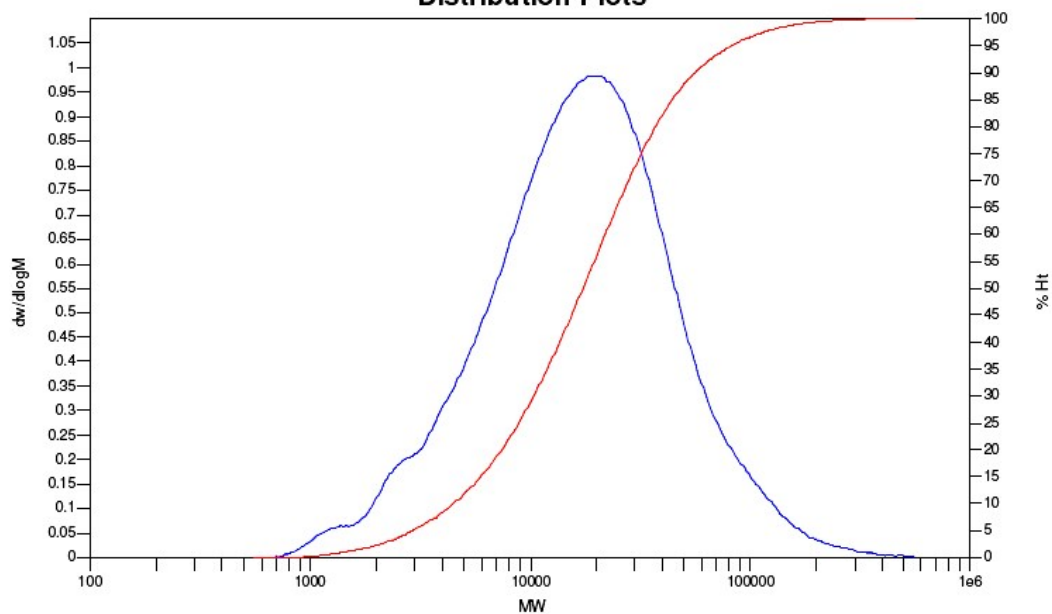

**Fig. S15** GPC trace for **P3**
